# Supplementary material for: Hydrophobic Amino Acids as Universal Elements of Protein-Induced DNA Structure Deformation
Source: PubMed Central journal article supplement (PMC7312683; doi:10.3390/ijms21113986), 2020-06-02

# Supplementary materials

Hydrophobic amino acids as universal elements of protein-induced DNA structure deformation

Kateřina Faltejsková David Jakubec and Jiří Vondrášek \*

May 26, 2020

---

\*To whom correspondence should be addressed. Tel: +420 220183267 ; Email: jiri.vondrasek@uochb.cas.cz

Table S1: Results of one-sided Mann–Whitney  $U$  test for datasets DS1 and DS2.

| Amino acid | DS1   |                    | DS2   |                    |
|------------|-------|--------------------|-------|--------------------|
|            | count | p-value            | count | p-value            |
| ALA        | 83    | $7 \cdot 10^{-11}$ | 68    | $3 \cdot 10^{-10}$ |
| ASN        | 69    | 0.02               | 52    | 0.26               |
| ASP        | 27    | 0.11               | 27    | $5 \cdot 10^{-3}$  |
| CYS        | 2     | 0.51               | 1     | 0.94               |
| GLU        | 27    | $2 \cdot 10^{-3}$  | 21    | 0.01               |
| GLN        | 45    | 0.82               | 43    | 0.56               |
| GLY        | 131   | $6 \cdot 10^{-5}$  | 116   | $8 \cdot 10^{-6}$  |
| HIS        | 40    | 0.92               | 38    | 0.64               |
| ILE        | 37    | $5 \cdot 10^{-7}$  | 31    | $7 \cdot 10^{-7}$  |
| LEU        | 38    | $2 \cdot 10^{-9}$  | 21    | $3 \cdot 10^{-4}$  |
| LYS        | 117   | 1                  | 110   | 1                  |
| MET        | 83    | $3 \cdot 10^{-4}$  | 15    | 0.09               |
| PHE        | 54    | $1 \cdot 10^{-10}$ | 35    | $9 \cdot 10^{-7}$  |
| PRO        | 56    | 0.23               | 45    | 0.27               |
| SER        | 72    | 0.04               | 60    | 0.09               |
| THR        | 62    | 0.03               | 49    | 0.29               |
| TRP        | 15    | 0.58               | 14    | 0.28               |
| TYR        | 41    | 0.84               | 37    | 0.76               |
| VAL        | 42    | $1 \cdot 10^{-10}$ | 27    | $3 \cdot 10^{-6}$  |

Figure S1: **a)** Portions of amino acids that were assigned a hydrogen bond (calculated from all amino acids that were assigned an interaction by the SNAP program from the 3DNA suite). **b)** Portions of amino acids assigned a van der Waals interaction. If the amino acid does not occur in a given category, it is indicated by a dash.

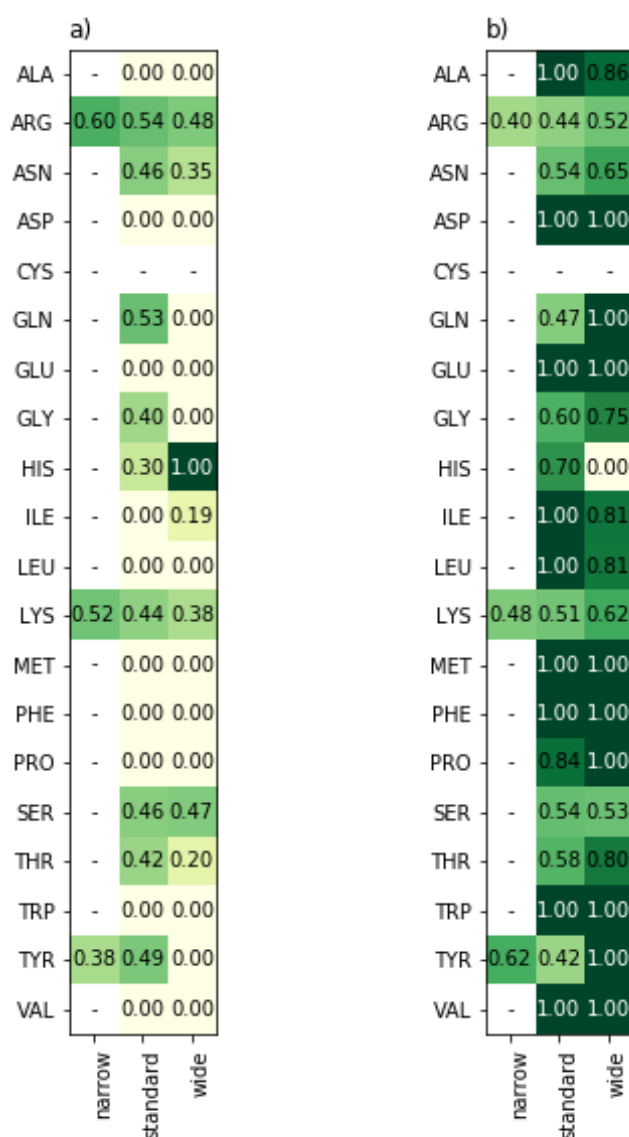

|        | H-bond<br>backbone --<br>base, narrow | H-bond<br>backbone --<br>base, std | H-bond<br>backbone --<br>base, wide | H-bond<br>backbone --<br>phosphate,<br>narrow | H-bond<br>backbone --<br>phosphate, std | H-bond<br>backbone --<br>phosphate, wide | H-bond<br>backbone --<br>sugar, narrow | H-bond<br>backbone --<br>sugar, std | H-bond<br>backbone --<br>sugar, wide |
|--------|---------------------------------------|------------------------------------|-------------------------------------|-----------------------------------------------|-----------------------------------------|------------------------------------------|----------------------------------------|-------------------------------------|--------------------------------------|
| 0 ALA  | 0                                     | 3                                  | 4                                   | 0                                             | 2                                       | 0                                        | 0                                      | 0                                   | 0                                    |
| 1 ARG  | 5                                     | 14                                 | 3                                   | 20                                            | 26                                      | 0                                        | 2                                      | 3                                   | 1                                    |
| 2 ASN  | 0                                     | 2                                  | 0                                   | 1                                             | 2                                       | 0                                        | 0                                      | 0                                   | 0                                    |
| 3 ASP  | 0                                     | 0                                  | 0                                   | 0                                             | 2                                       | 0                                        | 0                                      | 0                                   | 0                                    |
| 4 GLN  | 0                                     | 3                                  | 1                                   | 0                                             | 4                                       | 0                                        | 0                                      | 1                                   | 0                                    |
| 5 GLY  | 4                                     | 50                                 | 4                                   | 1                                             | 0                                       | 1                                        | 2                                      | 15                                  | 0                                    |
| 6 HIS  | 0                                     | 0                                  | 0                                   | 0                                             | 1                                       | 0                                        | 0                                      | 0                                   | 0                                    |
| 7 ILE  | 0                                     | 2                                  | 3                                   | 0                                             | 2                                       | 0                                        | 0                                      | 0                                   | 0                                    |
| 8 LEU  | 0                                     | 1                                  | 1                                   | 0                                             | 1                                       | 0                                        | 0                                      | 0                                   | 0                                    |
| 9 LYS  | 2                                     | 2                                  | 5                                   | 2                                             | 18                                      | 0                                        | 0                                      | 2                                   | 1                                    |
| 10 MET | 0                                     | 1                                  | 1                                   | 0                                             | 1                                       | 0                                        | 0                                      | 0                                   | 0                                    |
| 11 PHE | 0                                     | 3                                  | 3                                   | 0                                             | 0                                       | 0                                        | 0                                      | 0                                   | 0                                    |
| 12 PRO | 1                                     | 1                                  | 1                                   | 0                                             | 0                                       | 0                                        | 1                                      | 0                                   | 0                                    |
| 13 SER | 0                                     | 2                                  | 1                                   | 1                                             | 2                                       | 1                                        | 0                                      | 3                                   | 0                                    |
| 14 THR | 0                                     | 0                                  | 0                                   | 1                                             | 2                                       | 0                                        | 0                                      | 0                                   | 0                                    |
| 15 TRP | 0                                     | 0                                  | 0                                   | 3                                             | 4                                       | 0                                        | 0                                      | 0                                   | 0                                    |
| 16 TYR | 0                                     | 0                                  | 0                                   | 3                                             | 5                                       | 0                                        | 0                                      | 0                                   | 0                                    |
| 17 VAL | 0                                     | 0                                  | 2                                   | 0                                             | 0                                       | 0                                        | 0                                      | 1                                   | 0                                    |

Table S2. Populations of hydrogen bonding interactions between the main chain atoms of amino acids and various moieties of the nucleotides in the three DNA minor groove width categories; DS1 dataset.

Figure S2: DNA-contacting amino acids preferences for dinucleotide step sequences.

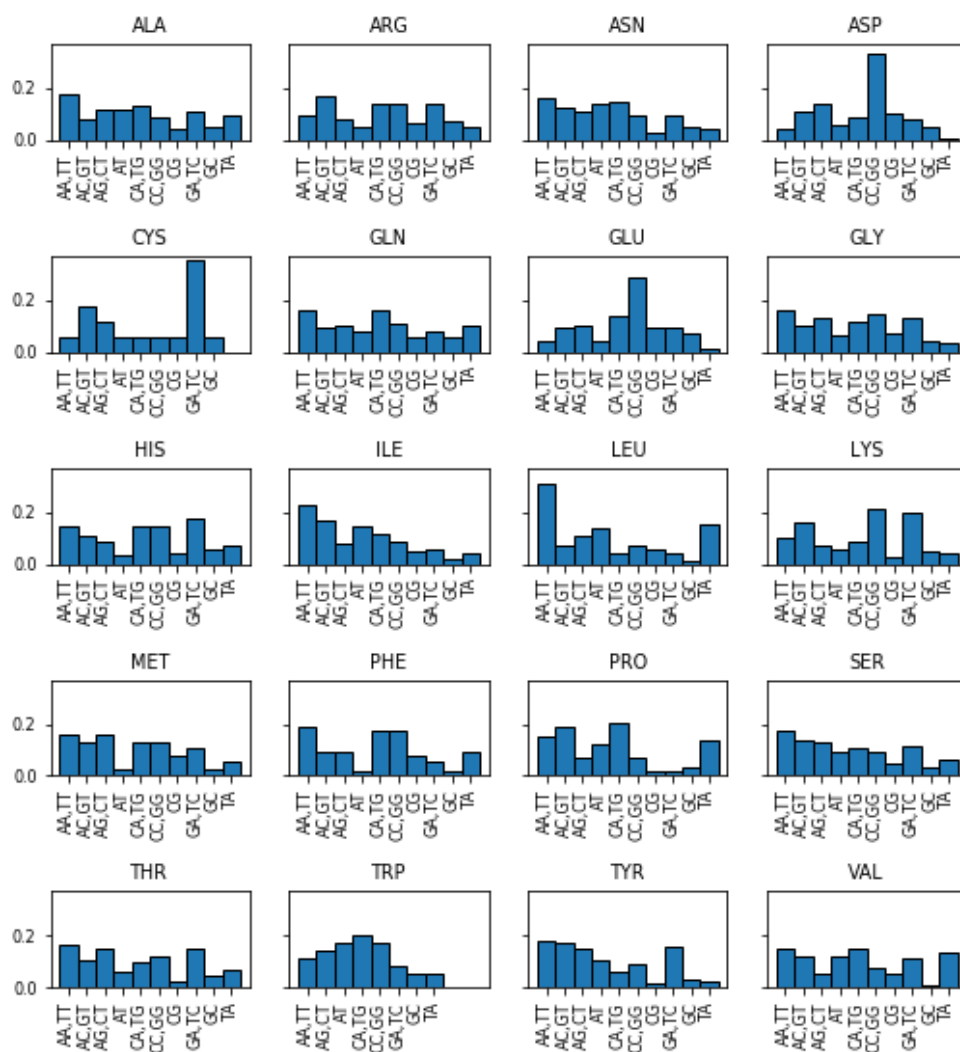

Figure S3: DNA-contacting amino acids preferences for dinucleotide step sequence groups. Sequences consisting only of A and T bases are classified into "AT" group, similarly sequences consisting only of C and G bases. All sequences that do not belong to "AT" or "CG" group are classified into "mix" group.

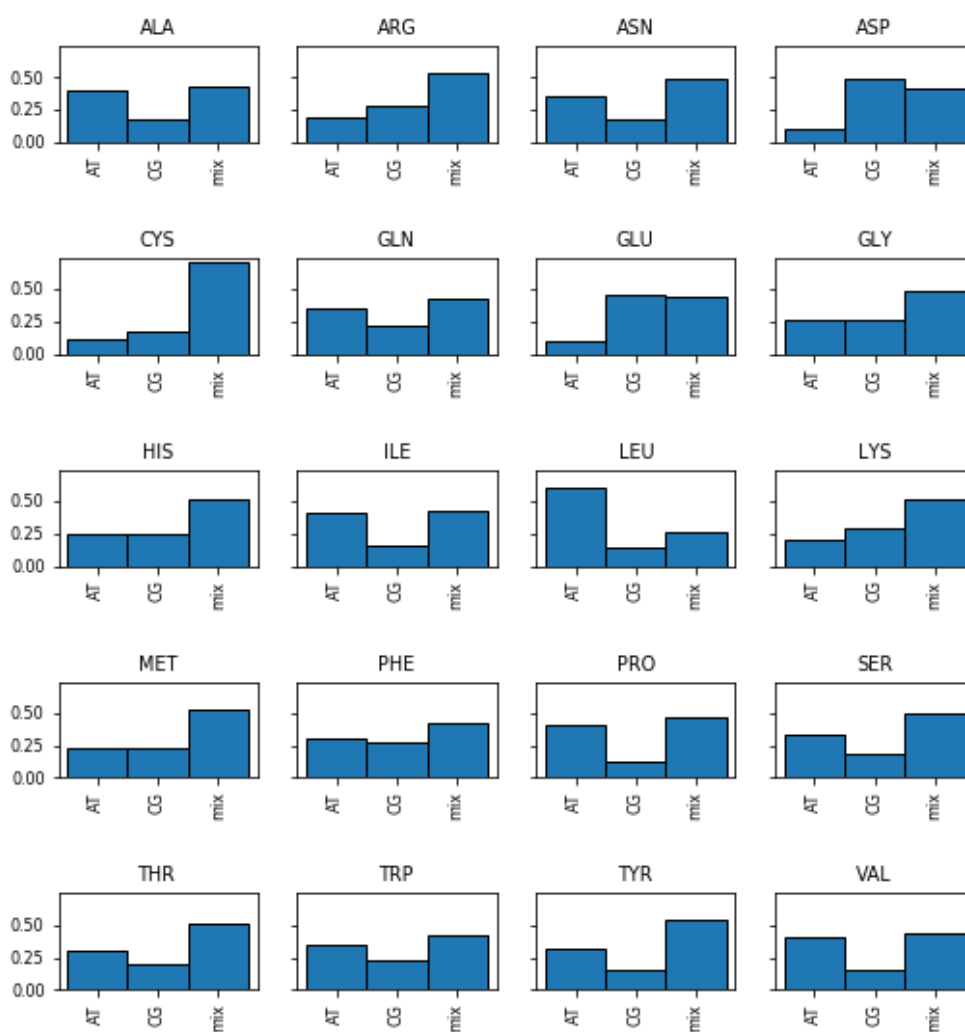

Supplement: ijms-21-03986-s001.pdf [file ijms-21-03986-s001.pdf]
